# Supplementary material
Source: PubMed Central journal article supplement (PMC6855107)
Supplement: baADV2019000641-suppl1.pdf [file baADV2019000641-suppl1.pdf]

### Supplementary Figure S1

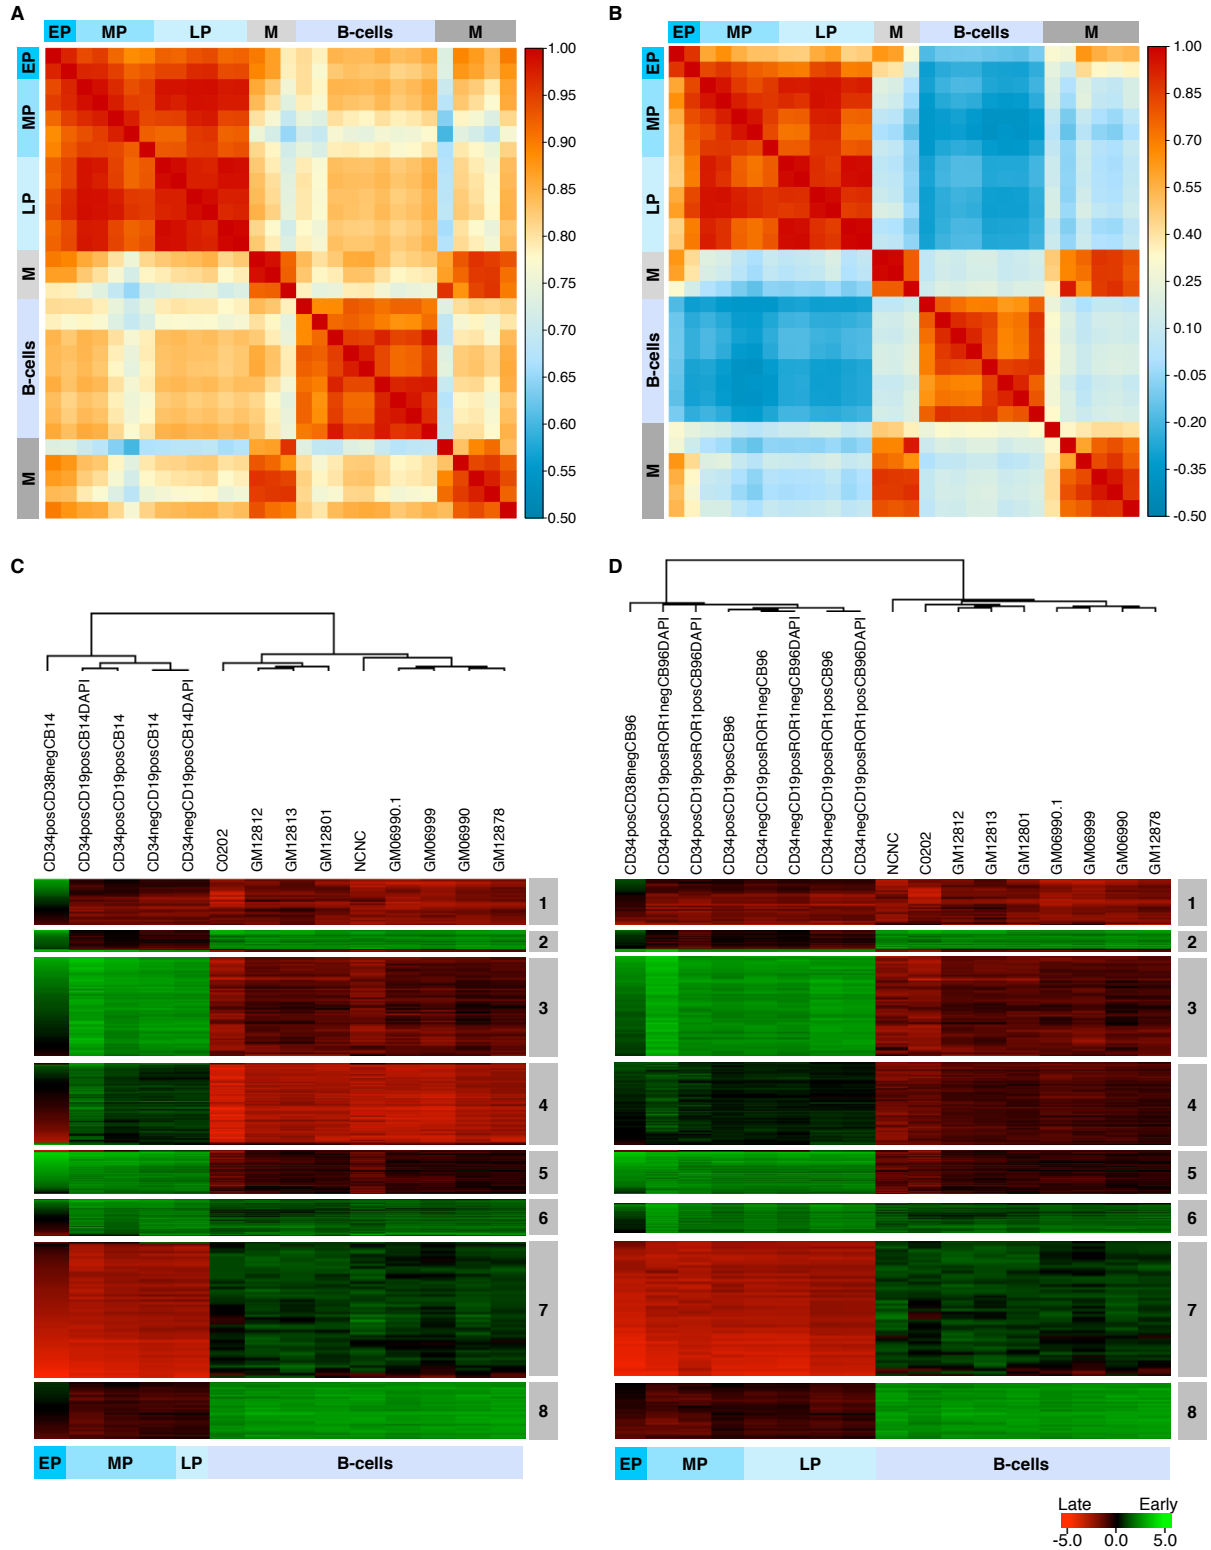

**Supplemental Figure S1.** Correlation matrix of normal blood cell types. **(A)** Whole genome correlations. **(B)** Correlations using only the RT variable genome segments. **(C-D)** RT signatures per cord blood. EP = early progenitors (CD34+CD38-), MP = middle progenitors (CD34+CD19+), LP = late progenitors (CD34-CD19+), T = normal T-cells, M = myeloid-erythroid progenitors.

## Supplementary Figure S2

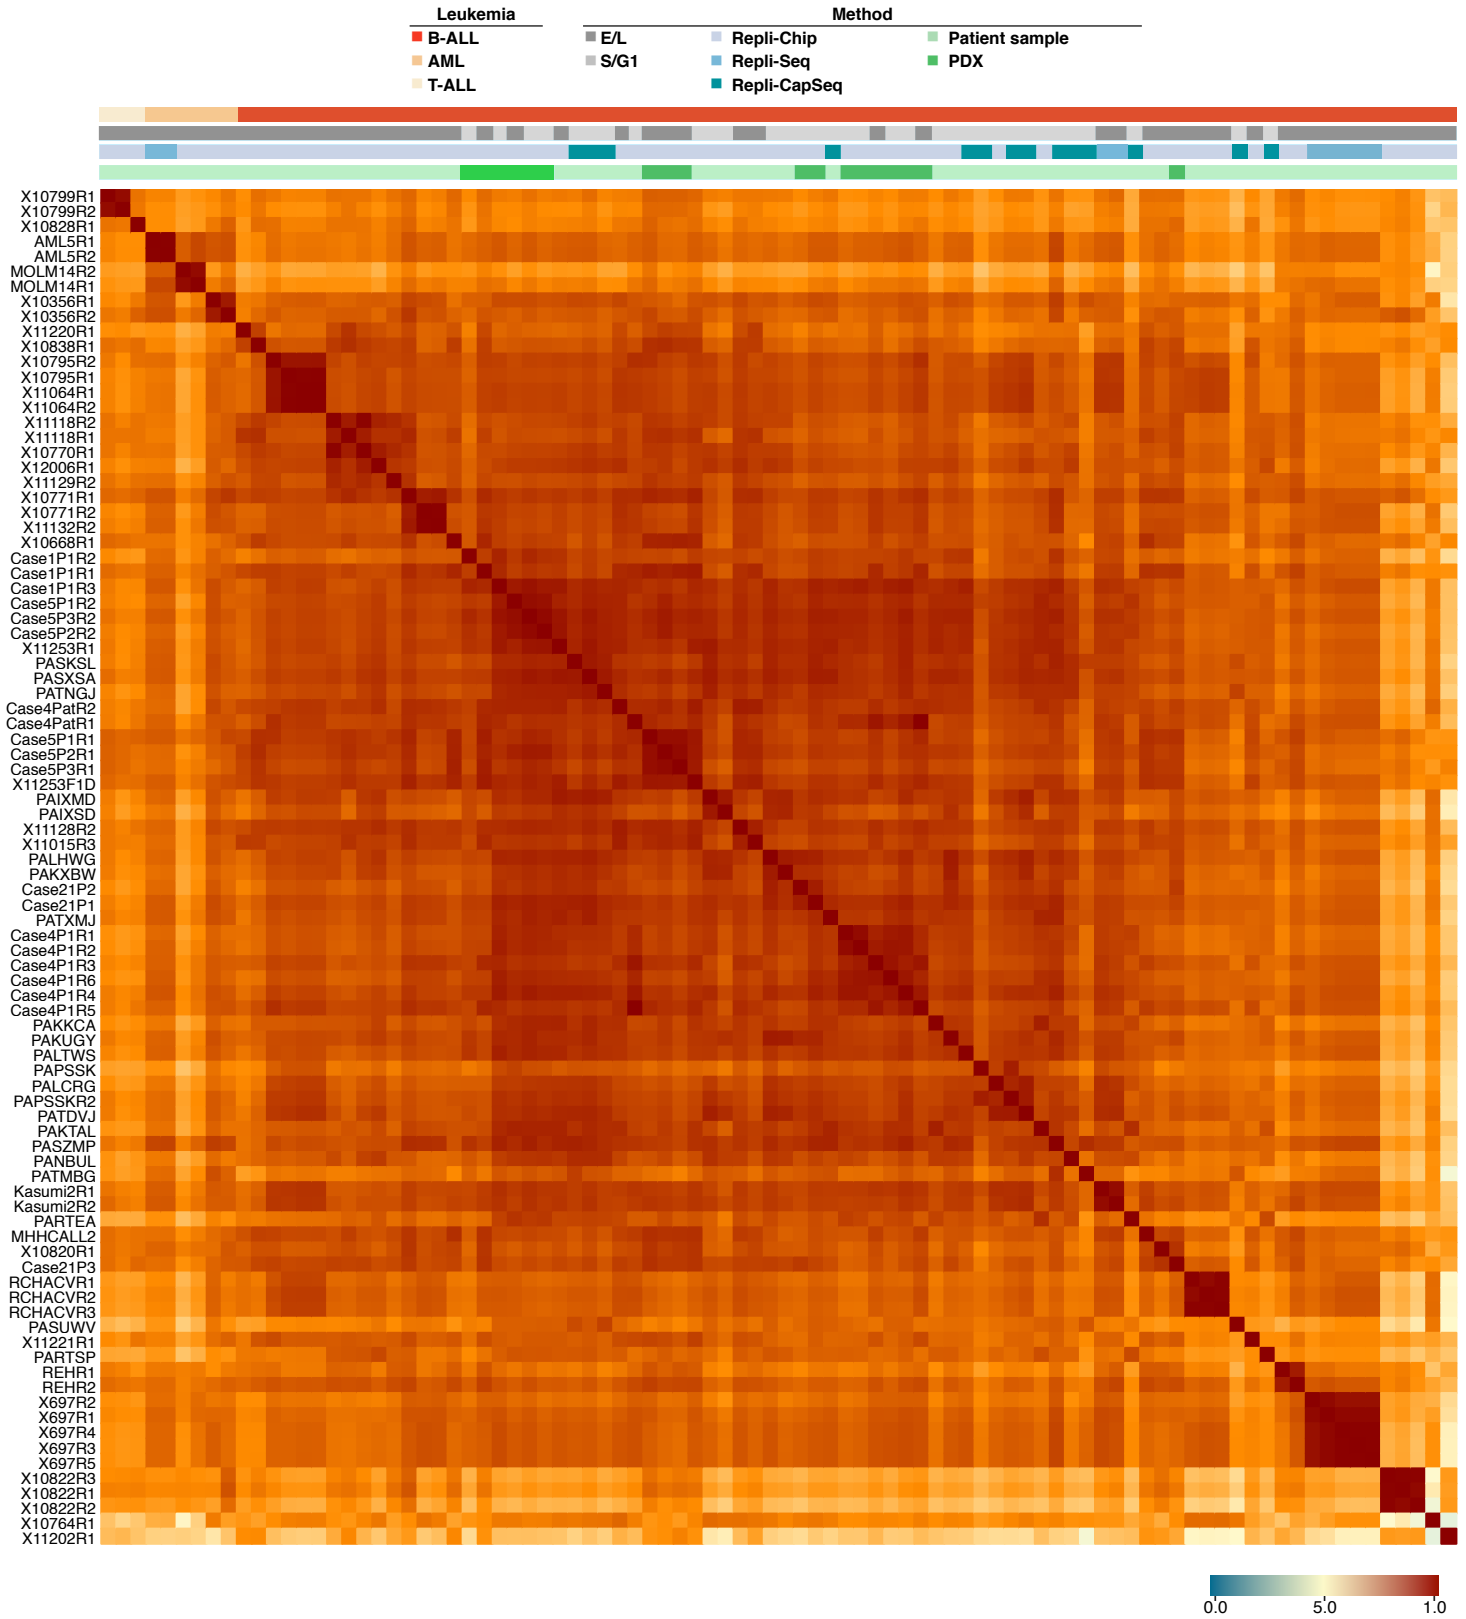

**Supplemental Figure S2. Correlation matrix of BCP-ALL patient samples.** Genome-wide RT datasets were divided into 55,940 50-kb segments, variable segments were removed and a correlation matrix of constitutive genomic segments was constructed. Datasets were sorted according to their similarity (Pearson's correlation) and are displayed in the same order as in **Figure 2C**.

### Supplementary Figure S3

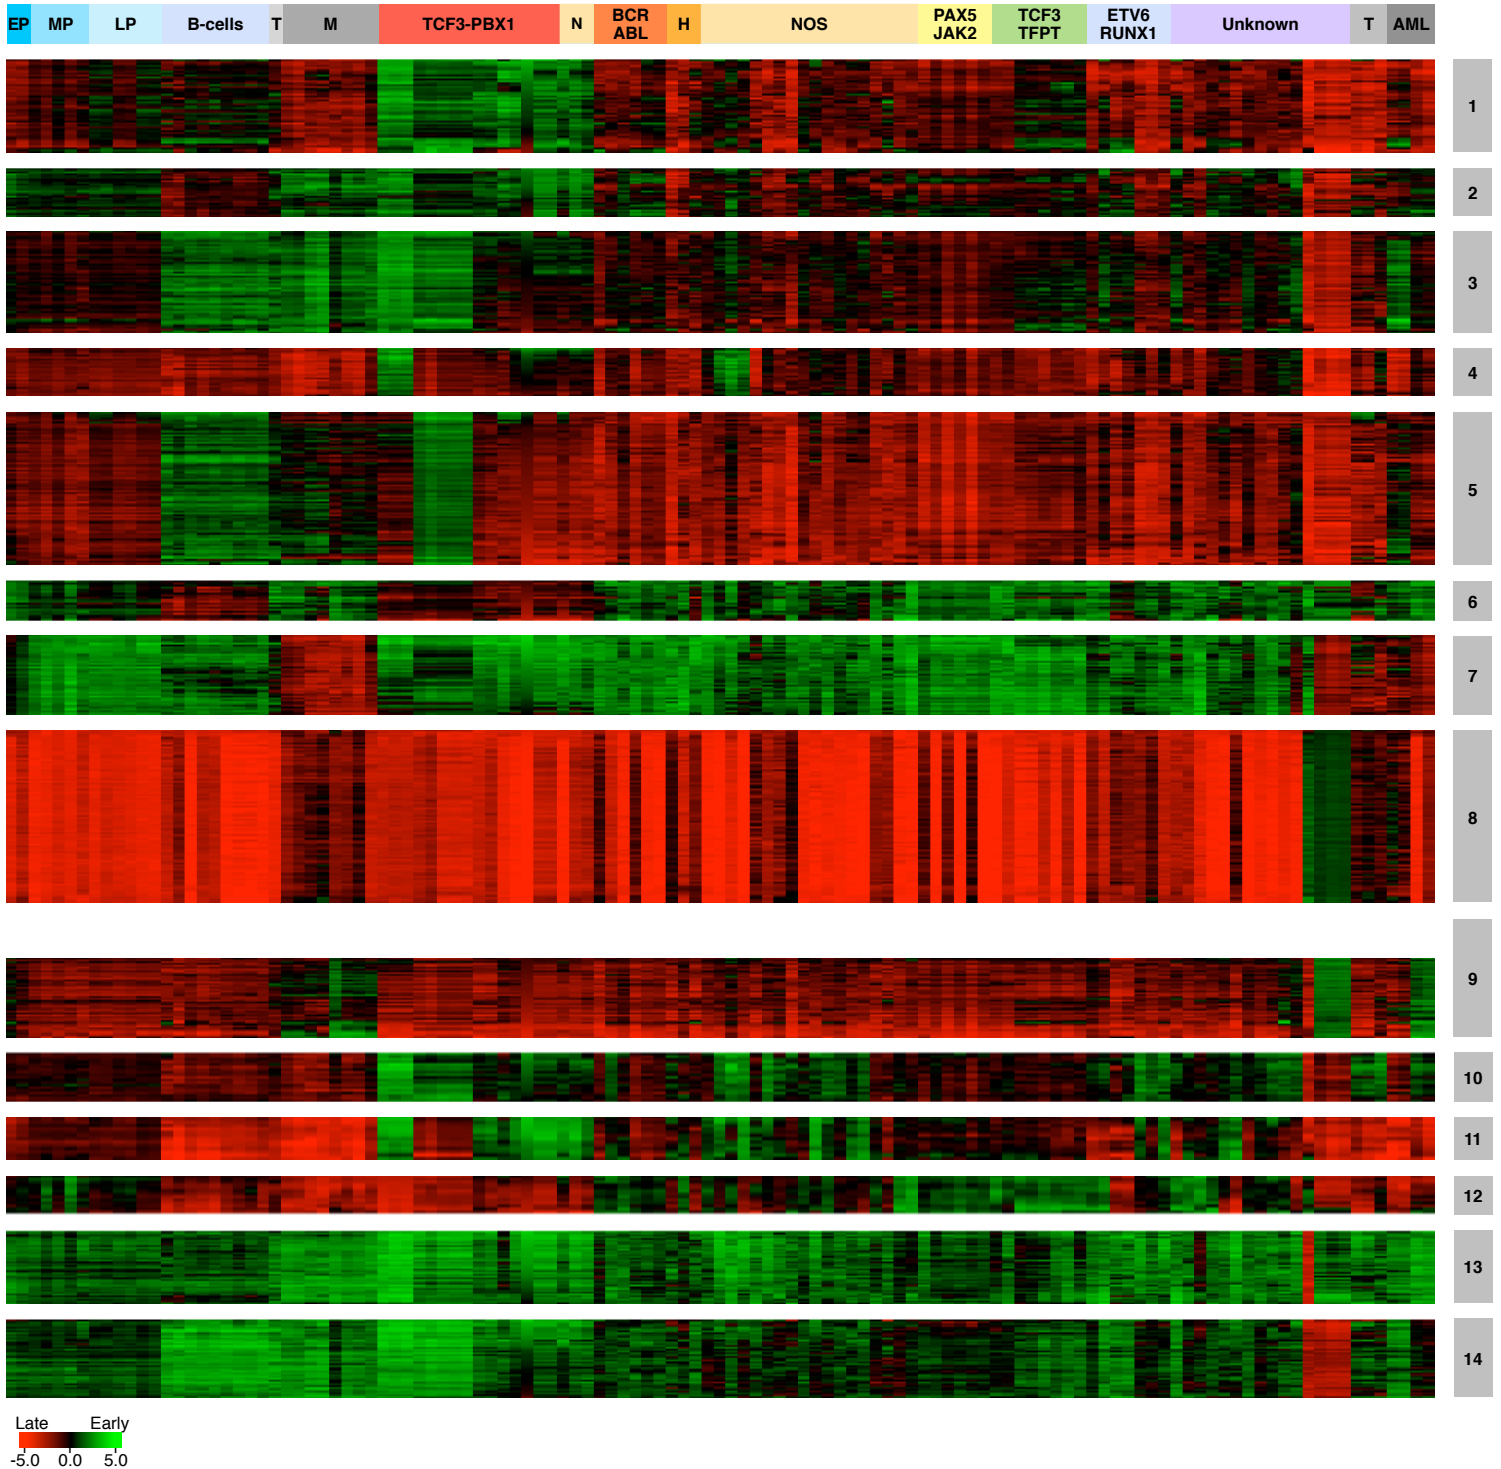

**Supplemental Figure S3.** RT patterns of BCP-ALL RT signatures in normal blood cell types. RT of all genomic segments from RT signatures shown in **Figure 3A** are displayed together with the data derived from normal B-cell development. EP = early progenitors (CD34+CD38-), MP = middle progenitors (CD34+CD19+), LP = late progenitors (CD34-CD19+), T= normal T-cells, M = myeloid-erythroid progenitors.

### Supplementary Figure S4

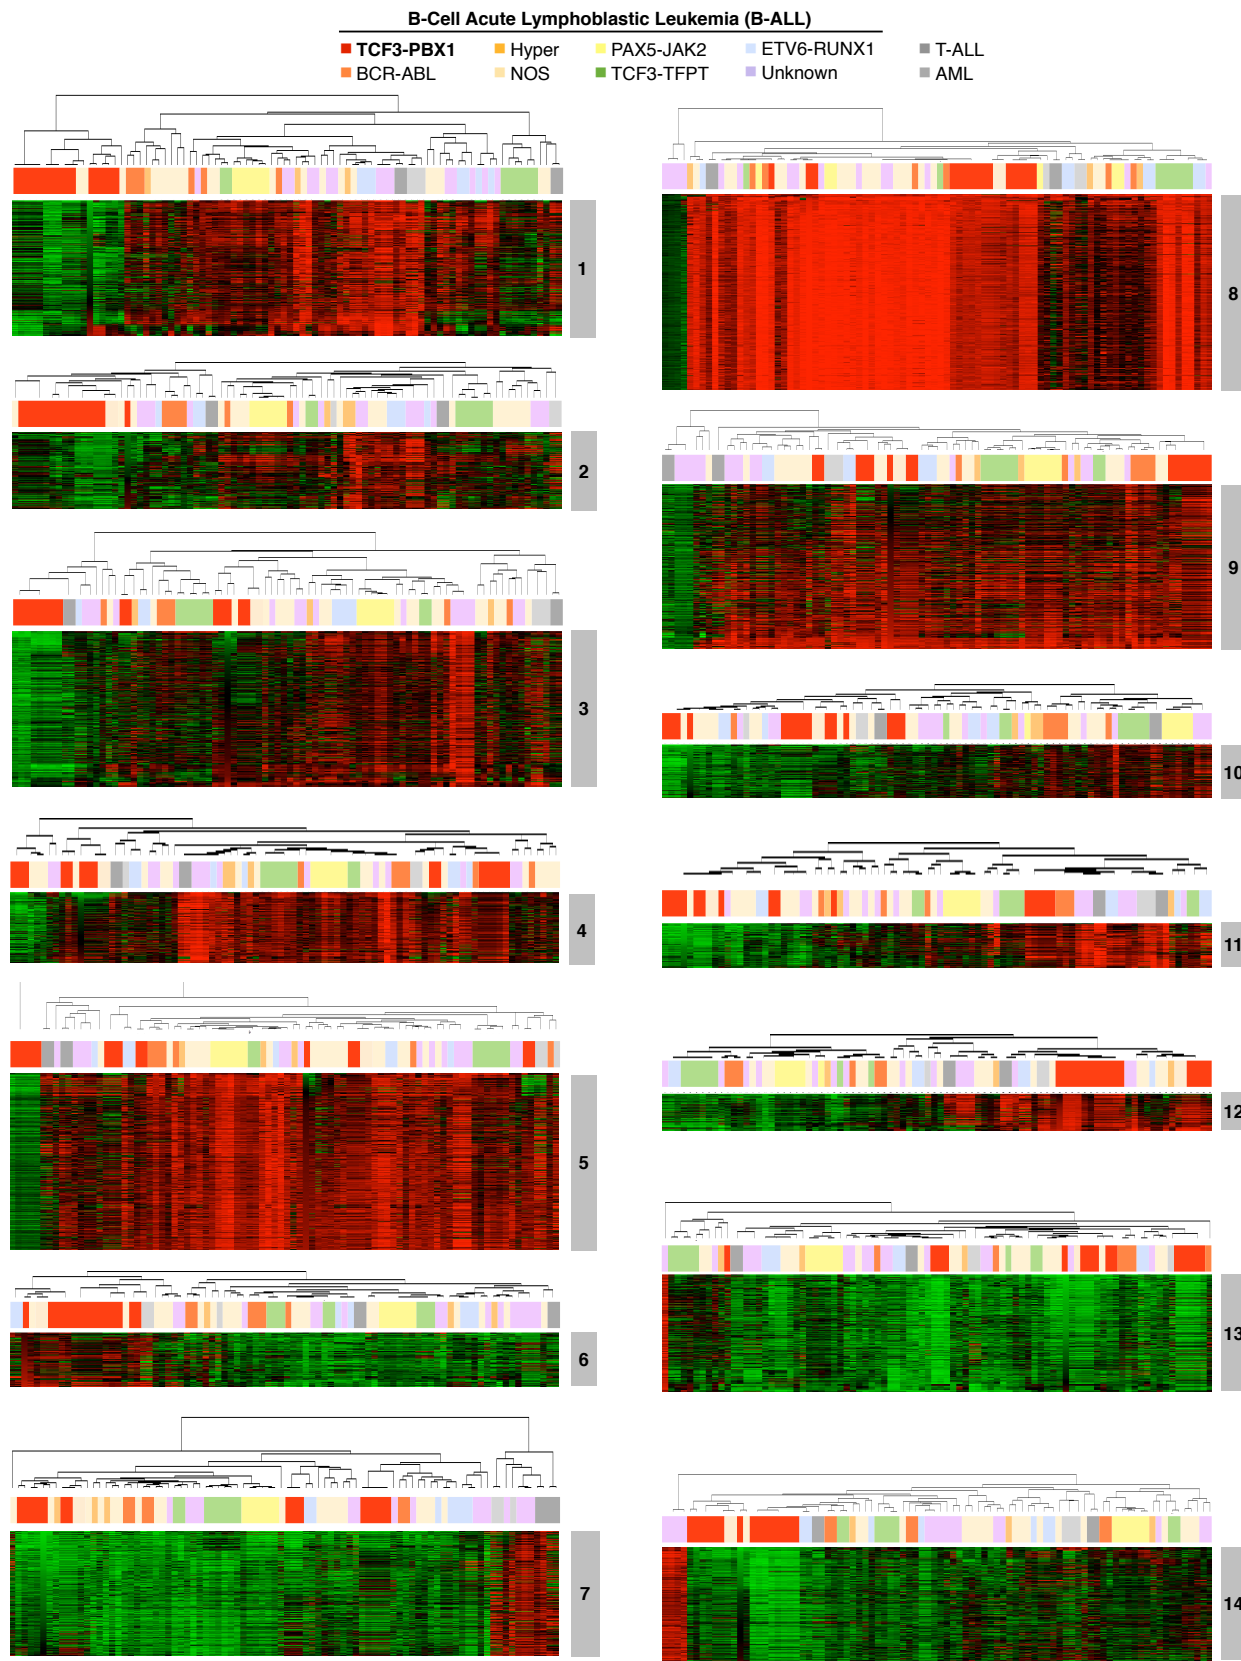

**Supplemental Figure S4.** Hierarchical clustering analysis for each BCP-ALL RT signature from main **Figure 3A**.

## Supplementary Figure S5

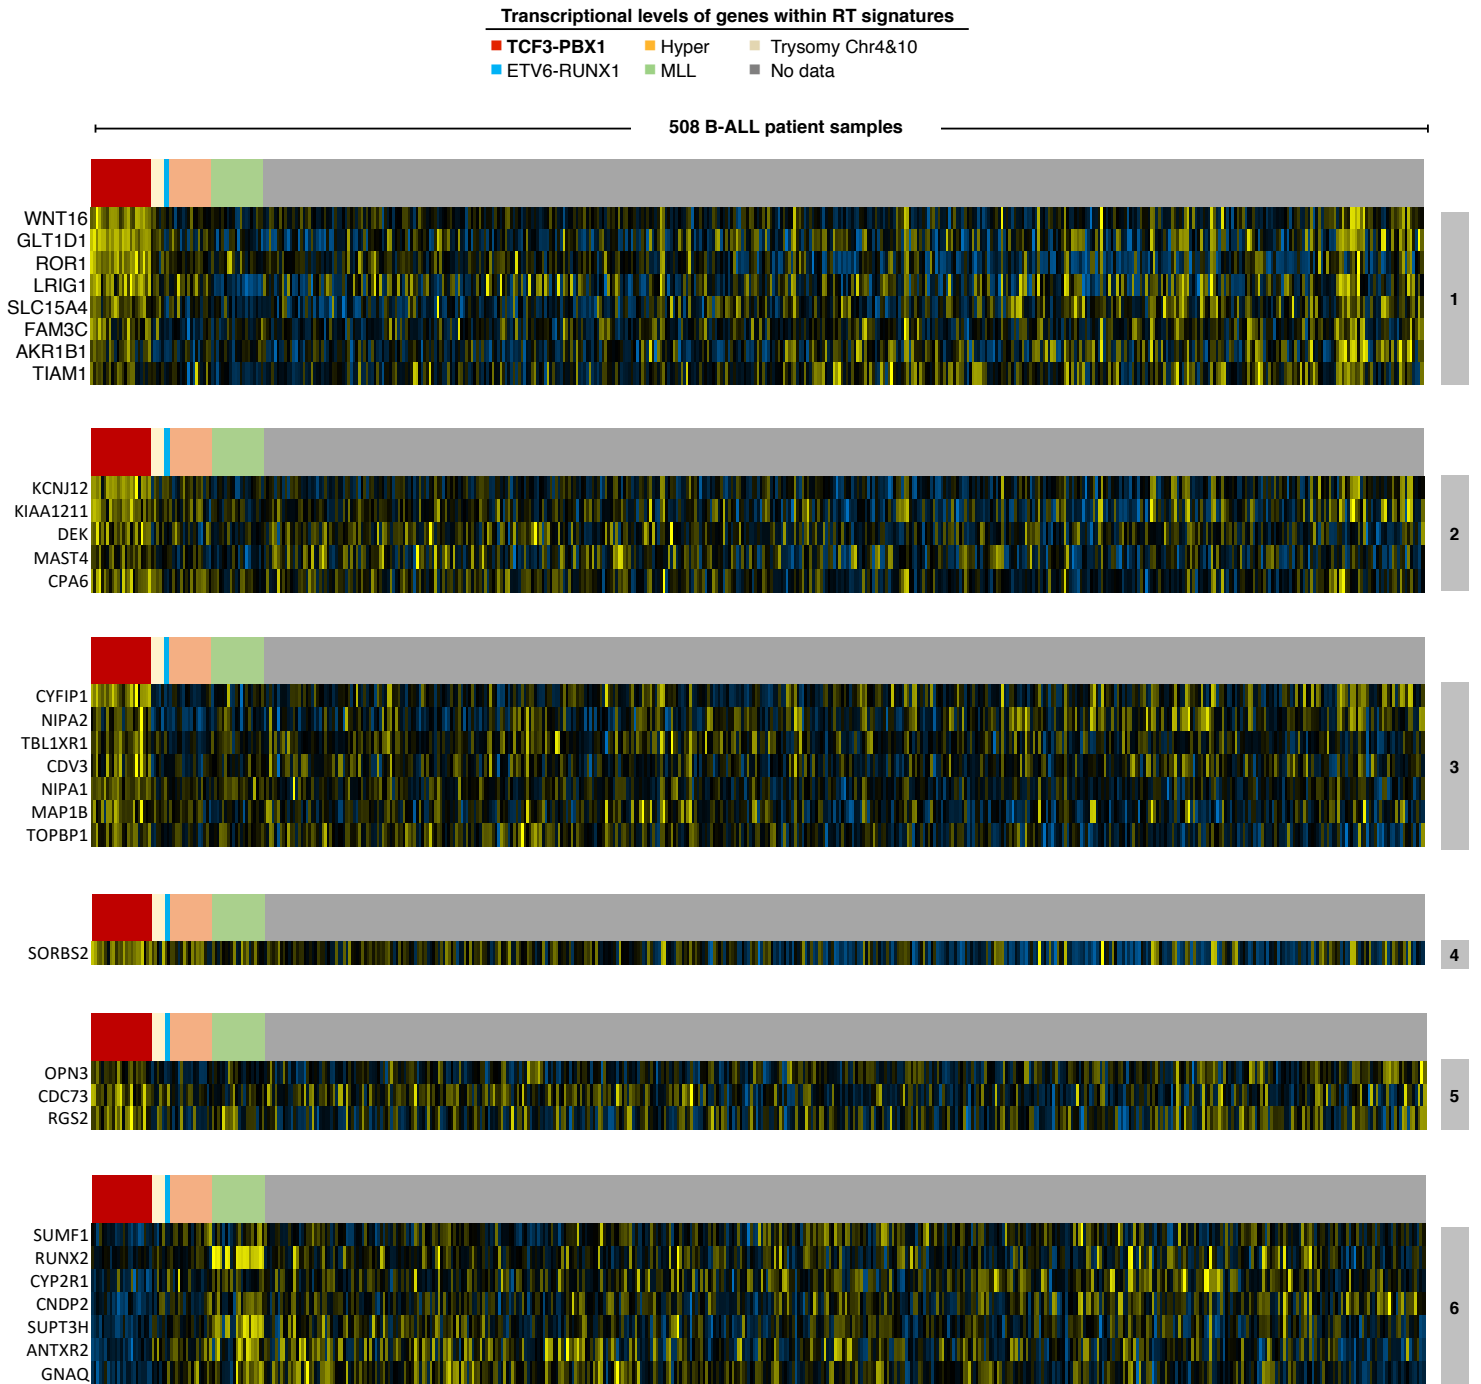

**Supplemental Figure S5.** Gene expression patterns of genes within the BCP-ALL RT signature from main **Figure 3A**. Transcriptome data from 508 B-ALL samples was obtained from the Therapeutically Applicable Research to Generate Effective Treatments (TARGET) (Ma et al., 2018).

## Supplementary Figure S6

**A**

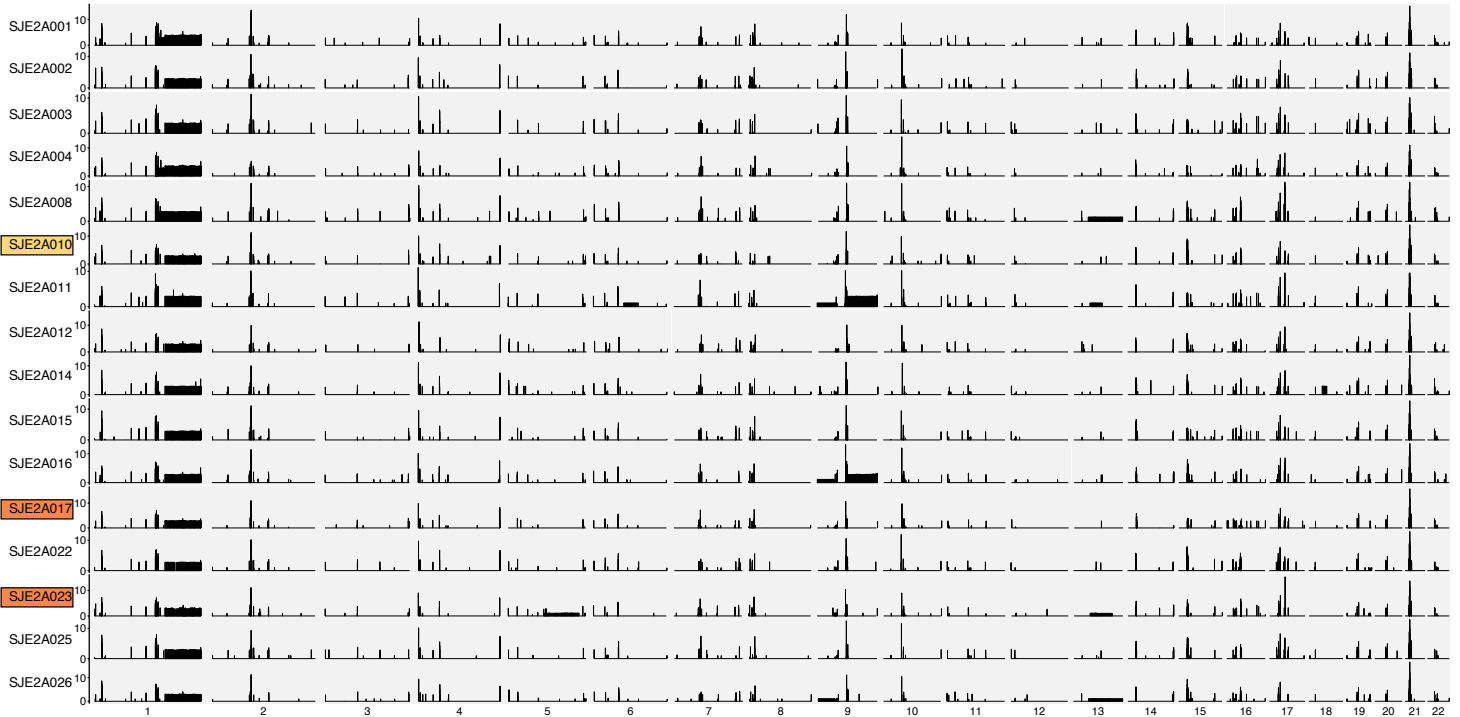

**B**

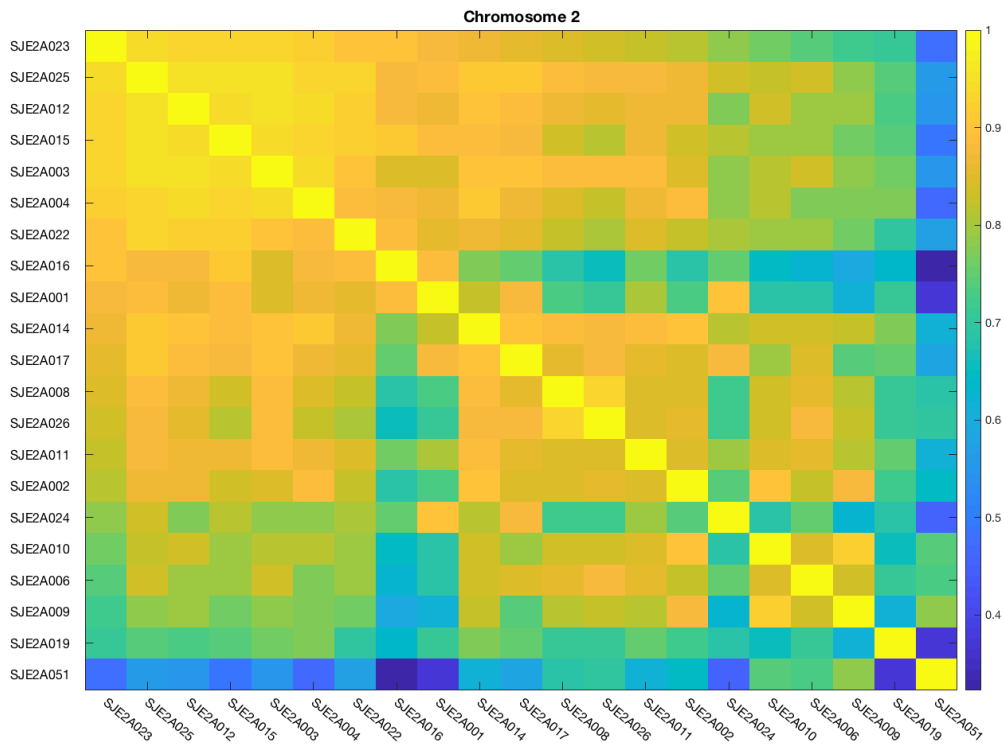

**Supplemental Figure S6.** Analysis of whole genome sequencing (WGS) data (28X coverage) from TCF3-PBX1-positive BCP-ALL patients. **(A)** Copy number variation (CNV) per chromosome across TCF3-PBX1-positive patients identified multiple loci amplifications. **(B)** Correlation matrix of the RT programs derived from WGS of TCF3-PBX1-positive BCP-ALL patients. WGS data was obtained from the St. Judes Pediatric Cancer Genome Project (PCGP).
